# 1 **Visual effort moderates a self-correcting nonlinear** 2 **postural control policy**

3  
4 Damian G. Kelty-Stephen<sup>1</sup>, I-Chieh Lee<sup>2</sup>, Nicole S. Carver<sup>3</sup>, Karl M. Newell<sup>4</sup>, and  
5 Madhur Mangalam<sup>5</sup>

6  
7 <sup>1</sup>Department of Psychology, Grinnell College, Grinnell, IA 50112, USA

8 <sup>2</sup>UNC-NC State Joint Department of Biomedical Engineering, UNC-Chapel Hill, Chapel  
9 Hill, NC 27514, USA

10 <sup>3</sup>Department of Psychology, University of Cincinnati, Cincinnati, Ohio, United States of  
11 America

12 <sup>4</sup>Department of Kinesiology, University of Georgia, Athens, GA 30602, USA

13 <sup>5</sup>Department of Physical Therapy, Movement and Rehabilitation Sciences, Northeastern  
14 University, Boston, MA 02115, USA

15

16 Author for correspondence:

17 Damian G. Kelty-Stephen

18 e-mail: [keltysda@grinnell.edu](mailto:keltysda@grinnell.edu)

19 Madhur Mangalam

20 e-mail: [m.mangalam@northeastern.edu](mailto:m.mangalam@northeastern.edu)

21

22 **Ethics statement.** The present study was approved by the Institutional Review Board  
23 (IRB) at the University of Georgia (Athens, GA). All participants provided verbal and  
24 written informed consent before participation.

25 **Data accessibility.** All data analyzed in the present study are available upon request.

26 **Author contributions:** D.G.K-S., I.-C.L., K.M.N., and M.M. conceived and designed  
27 research; I.-C.L. performed experiments; D.G.K-S., N.S.C., and M.M. analyzed data;  
28 D.G.K-S. and M.M. interpreted results of experiments; M.M. prepared figures; D.G.K-S.  
29 and M.M. drafted manuscript; D.G.K-S., I.-C.L., K.M.N., and M.M. edited and revised  
30 manuscript; D.G.K-S., I.-C.L., N.S.C., K.M.N., and M.M. approved final version of  
31 manuscript.

32 **Competing interests.** Data available as part of the electronic supplementary material.

33 **Abstract**

34 A growing consensus across otherwise disparate perspectives on perception and  
35 action is that visually guided postural control emerges from within task constraints. Task  
36 constraints generate physiological fluctuations across various parts of the body. These  
37 fluctuations foster exploration of the available sensory information. For instance, standard  
38 deviation (*SD*) and temporal correlations of bodily sway can indicate how richly postural  
39 control samples available mechanical and visual information. Too much or too little *SD* entails  
40 destabilization of posture. Temporal correlations show a similar relationship, but they have  
41 also been shown to support carrying sampled information to other aspects of the postural  
42 system. The present study shows that increasing visual constraints on posture reveals an  
43 adaptive relationship between *SD* and temporal correlations of postural fluctuations. In short,  
44 changing the viewing distance of a fixation target shows that temporal correlations self-correct  
45 themselves across time and diminish *SD* across time as well. Notably, these relationships  
46 were strong for all viewing distances except the most comfortable viewing and reaching  
47 distance. This self-correcting relationship allows the visual layout itself to press the postural  
48 system into a poise for engaging with objects and events in the surrounding.

49 **Keywords:** biotensegrity, center of mass, center of pressure, fractality, Hurst's exponent,  
50 postural sway

## 51 **1. Introduction**

### 52 **1.1. Stability of suprapostural visual activities at longer scales rests on fluctuating** 53 **behavior at shorter scales**

54 Standing quietly and maintaining focus on a target in front of us is the preamble to very many  
55 coordinated behaviors—we might lean forward and reach or track the target's progress and  
56 bat it away. However, this starting position is not merely the preamble to action but is already  
57 a rich wellspring of the action itself, exhibiting a continuous stream of intermittent fluctuations.  
58 We can see these fluctuations in our bodily center of mass (CoM) and center of pressure  
59 (CoP), where ground reaction forces meet our lower extremities. So long as they do not pitch  
60 the CoP beyond the base of support, these fluctuations are crucial to maintaining a quiet  
61 stance [1,2]. This variability offers the body a subtle and flexible command of the mechanical  
62 surface underfoot [3,4], exemplifying long-respected proposals that noise can stabilize  
63 nonlinear-dynamical systems [5,6].

64 Lacing our postural system into our visual field are eyes, moving to lock focus on a  
65 distal point in the world. Admittedly, maintaining focus involves “fixations” of the eyes no less  
66 than upright posture can seem “still,” but this fixation is not stasis: fixations are regularly  
67 recognized as a class of movement [7] consisting of a vibrant, fluctuating foundation of  
68 smaller movements called “microsaccades” [8]. These microsaccades serve to stabilize  
69 images that would otherwise fade on a static retina [9], thus playing a similar role to the visual  
70 system that fluctuations play for the postural system. Indeed the exploratory role of fluctuating  
71 movements extends to the extremities of the body besides and intermediating between  
72 upright posture and vision [10], suggesting a strong role for postural sway in supporting visual  
73 perception [11–13]. Thus, even when standing quietly upright while fixating at a visual target,  
74 the body is coursing with fluctuations ferrying information across the body.

75 The present work aims to explore how visual effort might affect how fluctuations flow  
76 within the bodywide postural system. Postural fluctuations produce translations and rotations  
77 of visible surfaces specific to the spatial relationships of the objects in the visual field. These  
78 movement-induced translations and rotations compose an optic flow that provides visual  
79 support for the subsequent movement. Thus, subtle postural sway offers the sighted organism  
80 a rich source of information about the layout of objects in the visual field. The visual layout  
81 itself then presses the postural system into a poise for engaging with objects and events in  
82 the surrounding. Visual targets appearing closer to or farther from the looking postural system  
83 impose retina-specific constraints of oculomotor convergence [14,15] and chromatic  
84 aberration [16]. Consequently, changes in a target's size relative to other aspects of the visual  
85 field entails changes in optic flow (figure 1). These multi-scale factors affect postural stability,  
86 reflecting changes in postural configurations and hence in the flow of information needed to  
87 organize these postures.

### 88 **1.2. Perceptual constraints on postural stability could reshape intrapostural** 89 **interactivity**

90 In the present study, we aim to explore how changing the viewing distance might  
91 change how the postural system exchanges fluctuations within and between CoM and CoP.  
92 We examined the relationship between bulk variability in CoP fluctuations (i.e., standard  
93 deviation, *SD*) and temporal structure (i.e., fractal scaling, *H*) in CoM and CoP fluctuations.  
94 The implication of *SD* is the prevailing tradition, but that of fractality rests on two until-recently  
95 parallel bodies of evidence, one specifically requiring variations in fractal geometry for  
96 modeling the bodywide organization of the movement system and the second suggesting that

97 capacity of bodily fluctuations to ferry information inheres at least partially in its fractal  
98 structure. Movement depends on the bodywide network of connective tissues and nervous  
99 tissues, forming flexible relationships that balance tensions with compressions at multiple  
100 scales of analysis [17–23]. This organization entails a specifically multifractal geometry that  
101 embodies multiple scale-invariant patterns of behavior (e.g., microsaccades within the  
102 saccades that intersperse larger saccades by the eye and turns by the head) across time and  
103 across space. CoP fractality has repeatedly borne a consistent relationship to perceptual  
104 judgments of visual and haptic stimuli [24–29], and research into perceptual tasks (e.g.,  
105 manually wielding an object to judge heaviness or length) while standing shows that a  
106 bodywide flow of fractal fluctuations precedes and shapes the verbal articulation of perceptual  
107 judgments [30,31]. Hence, a fractal flow within posture seems to support information flow and  
108 might provide a glimpse of the control policy emerging from bodily situation in task  
109 constraints.

### 110 **1.3. Visual effort for fixating across different viewing distances could reveal different** 111 **relationships amongst CoM fractality, CoP fractality, and CoP *SD***

#### 112 **1.3.1. The task**

113 The present work is a reanalysis of a previous study that manipulated viewing distance  
114 while measuring CoM and CoP [32]. Healthy adults stood maintained a quiet stance under six  
115 different conditions: a control condition with eyes closed and five conditions with eyes open  
116 and fixating on a red laser point projected on surfaces at 20, 50, 135, 220, and 305 cm  
117 distance. We reanalyzed these data by carving individual trials under each viewing condition  
118 into non-overlapping sub-trial segments, estimating fractal scaling and *SD* within each  
119 segment, and using vector autoregression (VAR) modeling to test the interactions among  
120 these descriptors across segments within each trial.

#### 121 **1.3.2. The hypotheses**

122 *Hypothesis 1: Weaker intrapostural interactivity while standing quietly with eyes closed.*

123 First, respecting the evidence that maintaining fixation recruits oculomotor effort that  
124 can perturb posture [33,34], we predicted that the addition of a fixation task to quiet standing  
125 would generally accentuate intrapostural interactivity, suggesting that standing quietly with  
126 eyes closed would show weaker evidence of intrapostural interactivity.

127 *Hypothesis 2: Resemblance between the 50-cm viewing condition and the eyes-closed*  
128 *condition.*

129 The 50-cm viewing distance is within the comfortable viewing distance, ideal for the  
130 human eyes' focus of red light [16], as well as ideal for requiring the least straining oculomotor  
131 convergence [14,15]. Hence, our last and most specific prediction was that the 50-cm viewing  
132 condition would yield intrapostural interactivity most closely resembling that in the eyes-closed  
133 condition. That is, because 50-cm requires the least visual strain, the effects among CoM  
134 fractality, CoP fractality, and CoP *SD* would show the least differences from the eye-closed  
135 condition.

136 *Hypothesis 3: Self-correction of fractality across 10-s segments.*

137 Postural sway is more correlated at short timescales on the order of 10 s and more  
138 anticorrelated over longer timescales [35]. For instance, posture roams freely about a fixed  
139 average CoP position but self-corrects at the margins of the base of support to maintain a  
140 quiet stance [35–37]. In this sense, we predicted that fractality itself would show similar self-

141 corrections over time, with prior increases in fractality followed by subsequent alternating  
142 decreases and increases in fractality. This self-correcting feature would be a crucial part of  
143 any control in which temporal correlations stabilize sway.

144 *Hypothesis 4: Inverse relationship between fractality and SD across 10-s segments.*

145 Because fractality entails long-range temporally organized responsivity to mechanical  
146 perturbations [38,39], we expected an inverse relationship between either or both of CoP and  
147 CoM fractality and CoP SD. That is, increases in CoP and CoM fractality would predict later  
148 decreases in CoP SD (Hypothesis 4a), as well as increases in CoP-SD would predict later  
149 decreases in CoP and CoM fractality (Hypothesis 4b). This feature could reflect a second key  
150 component of task-dependent emergent postural control.

151

## 152 **2. Materials and methods**

### 153 **2.1. Participants**

154 Seven adult men and nine adult women ( $M \pm 1SD$  age = 23.8 $\pm$ 3.9 years) without any  
155 skeletal or neuromuscular disorder voluntarily participated after providing verbal and written  
156 consent approved by the Institutional Review Board (IRB) at the University of Georgia  
157 (Athens, GA).

### 158 **2.2. Experimental task and procedure**

159 Each participant stood barefoot with one foot on each of two force plates (AMTI Inc.,  
160 Watertown, MA), 25 cm apart (figure 1a). From behind the participant, a laser pen projected a  
161 static point-light on the center of a 5 $\times$ 5" white tripod-mounted screen in front of a white visual-  
162 field-filling background. The two force plates measured 3D moments and ground reaction  
163 forces. The full-body motion of each participant was measured using VICON Plug-in Gait full-  
164 body 39 marker set and an 8-camera VICON motion tracking system (VICON Inc., Los  
165 Angeles, CA). The kinetic and kinematic data were synchronized and sampled at 100 Hz.

166 Each participant was instructed to maintain a quiet stance for 120 s under six different  
167 viewing conditions: eyes closed and while fixating visually on the point-light point positioned at  
168 25, 50, 135, 220, and 305 cm distance in front. Each participant completed 18 trials (6  
169 conditions  $\times$  3 trials) in a single 90-min session with randomized trial order and with breaks on  
170 request and between every six trials.

### 171 **2.3. Data processing**

172 All data processing was performed in MATLAB 2019b (Matlab Inc., Natick, MA). The  
173 position of the bodily center of mass (CoM) was estimated by submitting segment lengths of  
174 the head, trunk, pelvis, and left and right hand, forearm, upper arm, thigh, shank and foot to  
175 the equations provided by Zatsiorsky and Seluyanov [40], which yielded a 3D center of  
176 pressure (CoP) series describing CoM position along the participant's anterior-posterior (AP),  
177 medial-lateral (ML), and superior-inferior axes. 3D moments and ground reaction forces  
178 measured on each trial yielded a 2D center of pressure (CoP) series describing CoP position  
179 along the participant's AP and ML axes. Over 120 s duration, each trial yielded a 3D CoM  
180 series and a 2D CoP series each of 120 s or 12000 samples, divided into 12 segments of 10  
181 s or 1000 samples each. Each segment yielded two 999-sample one-dimensional series: a  
182 CoM spatial Euclidean displacement (SED) series describing the amplitude of CoM  
183 displacement (figures 2a to 2f) and a CoP planar Euclidean displacement (PED) series  
184 describing the amplitude of CoP displacement (figures 2a to 2f).

## 185 **2.4. Detrended fluctuation analysis (DFA)**

186 DFA estimates Hurst's exponent,  $H$ , describing the growth of root mean square  
187 (RMS) fluctuations with time for first-order displacements known as fractional Gaussian  
188 noises (fGn) [41,42]. First, it integrates time series  $x(t)$  with  $N$  samples to produce  
189  $y(t)$  :

$$190 \quad y(t) = \sum_{i=1}^N x(t) - \overline{x(t)} .$$

191 Next, DFA computes RMS residuals from the linear trend  $y_n(t)$  over nonoverlapping  $n$ -  
192 length bins of  $y(t)$  to build a fluctuation function  $f(N)$  :

$$193 \quad f(N) = \sqrt{(1/N) \sum_{i=1}^N (x(t) - \overline{x(t)})^2} ,$$

194 for  $n < N/4$ . On standard scales,  $f(N)$  is a power law:

$$195 \quad f(N) \sim n^H ,$$

196 where  $H$  is the scaling exponent.  $H$  is estimated as the slope of  $f(N)$  in log-log  
197 plots:

$$198 \quad \log f(N) = H \log(n) .$$

199 DFA estimated  $H_{fGn}$  for the original version (i.e., unshuffled) and a shuffled version (i.e.,  
200 a version with the temporal information destroyed) of each CoM SED series (CoM- $H_{fGn}$ ) and  
201 CoP PED series (CoP- $H_{fGn}$ ) over the following bin sizes: 4, 8, 12, ... 128; figures 2g and 2h).

## 202 **2.5. Vector autoregression (VAR) analysis**

203 VAR captures linear interdependencies amongst concurrent series and here modeled  
204 intrapostural effects of CoM- $H_{fGn}$ , CoP- $H_{fGn}$ , and CoP- $SD$  in one segment on CoM- $H_{fGn}$ , CoP-  
205  $H_{fGn}$ , and CoP- $SD$  in subsequent segments (figure 3). VAR describes each variable based on  
206 its own lagged value and that of each other variable. Lag is ideally increased until the  
207 residuals appear independently and are distributed identically [43].

208 VAR allows forecasting unique effects of endogenous variables on later values of each  
209 other through impulse-response functions (IRFs). IRFs evaluate the relationship between  
210  $f(t)$  and  $g(t+\tau)$ , or between  $g(t)$  and  $f(t+\tau)$ , where  $\tau$  is a whole number  
211 corresponding to a segment within a trial. Provided VAR residuals are independent and  
212 identically distributed (i.i.d.), orthonormalizing these residuals allows simulating an "impulse"  
213 to the system by adding 1SEM to any single variable, and using VAR coefficients to describe  
214 propagation of later "responses" across all endogenous variables. The IRF describes how an  
215 impulse in one series changes later predicted values in a different time series [44,45]. All VAR  
216 models converged with lag 1, with residuals passing all tests for i.i.d. status. We performed  
217 VAR analysis using the *vars* package in RStudio [46].

## 218 **2.6. Statistical analysis of pairwise IRFs**

219 A regression model [47] treated IRFs between each pair of postural descriptors as the  
220 dependent measure and tested the effect of predictors including the full-factorial set Trial  $\times$   
221 Segment  $\times$  Impulse  $\times$  Response using the *nlme* package for RStudio [48]. Impulse and  
222 Response served as class variables encoding the different descriptors (CoP- $H_{fGn}$  and CoM-  
223  $H_{fGn}$ , and CoP- $SD$ ) serving as impulse and as response variables, respectively. Orthogonal  
224 linear, quadratic, and cubic polynomials of Segment modeled how impulse-response

225 relationships changed over 999-sample segments within a trial. We used the cubic polynomial  
226 to capture the general nonlinear decay of IRFs across later segments. The interactions of  $H_{fGn}$   
227 or  $SD$  with Segment indicated changes in these effects with different third-order polynomial  
228 responses over subsequent trials. The Impulse  $\times$  Response terms highlighted significant  
229 differences of specific impulse-response pairs from the global patterns.

230

### 231 3. Results

#### 232 3.1 CoM and CoP showed fractal fluctuations

233  $H_{fGn}$  for all original series fell in the fractal range ( $0.5 < H_{fGn} < 1$ ; figures 2g and 2h) and  
234 significantly exceeded for all corresponding shuffled series ( $ps < 0.0001$ ; table S1), indicating  
235 fractal fluctuation in both CoM and CoP. Crossovers between shorter- (bin sizes: 4, 8, 12,...  
236 64) and longer-scale (bin sizes: 4, 8, 12,... 128) behavior exhibited no reliable differences, as  
237  $H_{fGn}$  estimates from only shorter-scale behavior correlated strongly with  $H_{fGn}$  estimates from  
238 the entire DFA fluctuation function (CoM: Spearman's  $\rho_s = 0.96, 0.91, 0.94, 0.94, 0.93$ , and  
239  $0.94$  for the eyes-closed and the 25-, 50-, 135-, 220-, and 305-cm eyes-open conditions,  
240 respectively,  $ps < 0.0001$ ); CoP:  $\rho_s = 0.96, 0.89, 0.93, 0.92, 0.91$ , and  $0.94$ ,  $ps < 0.0001$ ).

#### 241 3.2. Maintaining a quiet stance with eyes closed weakened intrapostural interactivity 242 with trials (Hypothesis 1)

243 When maintaining a quiet stance with eyes closed, prior increases in CoM- $H_{fGn}$  showed  
244 no significant later CoP- $SD$  responses and only subtle later CoP- $H_{fGn}$  and CoM- $H_{fGn}$   
245 responses (figures 4a and 4b). Regression modeling of IRFs (table S2) showed that  
246 increases in CoM- $H_{fGn}$  preceded a short-term subsequent decrease and slow, nonlinear  
247 rebound (Segment(Quad):  $b = -6.19 \times 10^{-1}$ ,  $p = 0.017$ ; and Segment(Cubic):  $b = 5.36 \times 10^{-1}$ ,  $p =$   
248  $0.040$ ) in all variables except CoP- $SD$  (Segment(Quad)  $\times$  Response(CoP- $SD$ ):  $b = 6.21 \times 10^{-1}$ ,  
249  $p = 0.092$ ). This decrease-and-nonlinear-rebound was canceled out with Trial for later CoM-  
250  $H_{fGn}$  responses (Trial  $\times$  Segment(Quad):  $b = 4.29 \times 10^{-1}$ ,  $p < 0.001$ ; Trial  $\times$  Segment(Cubic):  $b =$   
251  $-3.27 \times 10^{-1}$ ,  $p = 0.007$ ) but showed no such change for later CoP- $H_{fGn}$  responses (Trial  $\times$   
252 Segment(Quad)  $\times$  Response(CoP- $H_{fGn}$ ):  $b = -4.04 \times 10^{-1}$ ,  $p = 0.018$ ; and Trial  $\times$   
253 Segment(Cubic)  $\times$  Response(CoP- $H_{fGn}$ ):  $b = 3.45 \times 10^{-1}$ ,  $p = 0.042$ ) and CoP- $SD$  responses  
254 (Trial  $\times$  Segment(Quad)  $\times$  Response(CoP- $SD$ ):  $b = -4.27 \times 10^{-1}$ ,  $p = 0.012$ ; and Trial  $\times$   
255 Segment(Cubic)  $\times$  Response(CoP- $SD$ ):  $b = 3.28 \times 10^{-1}$ ,  $p = 0.054$ ).

256 Closing eyes weakened the responsiveness of all measures to prior increases in each  
257 other and in CoM- $H_{fGn}$ , amounting to no later effects of  $SD$  and vanishing effects of CoP- $H_{fGn}$   
258 with Trial (figure 4c and 4d). Specifically, regression terms canceled out and reversed effects  
259 of prior increases of CoP- $SD$  (Segment(Quad)  $\times$  Impulse(CoP- $SD$ ):  $b = 7.95 \times 10^{-1}$ ,  $p = 0.031$ )  
260 and CoP- $H_{fGn}$  (Segment(Quad)  $\times$  Impulse(CoP- $H_{fGn}$ ):  $b = 1.35 \times 10^0$ ,  $p < 0.001$ ). The eyes-  
261 closed condition did show positive effects of prior increases in CoP- $H_{fGn}$  on later effects  
262 decaying slowly with Segment (Segment(Linear)  $\times$  Impulse(CoP- $H_{fGn}$ ):  $b = -7.05 \times 10^{-1}$ ,  $p =$   
263  $0.056$ ; and Segment(Quad)  $\times$  Impulse(CoP- $H_{fGn}$ ):  $b = 1.35 \times 10^0$ ,  $p < 0.0001$ ), but this effect  
264 disappeared with Trial (Trial  $\times$  Segment(Linear)  $\times$  Impulse(CoP- $H_{fGn}$ ):  $b = 4.86 \times 10^{-1}$ ,  $p =$   
265  $0.004$ ; Trial  $\times$  Segment(Quad)  $\times$  Impulse(CoP- $H_{fGn}$ ):  $b = -1.04 \times 10^0$ ,  $p < 0.0001$ ).

266 Critically, the eyes-closed condition diminished intrapostural interactions between CoP-  
267  $H_{fGn}$  and CoP- $SD$ , leaving CoP- $SD$  to predict much of the later behavior elsewhere. All  
268 significant interactions involving Impulse(CoP- $H_{fGn}$ ) and Response(CoP- $SD$ ) significantly  
269 canceled out the corresponding lower-order interactions of Impulse(CoP- $H_{fGn}$ ), effectively

270 muting the effects of a prior CoP- $H_{fGn}$  impulse on later CoP- $SD$  responses [e.g.,  
271 Segment(Quad)  $\times$  Impulse(CoP- $H_{fGn}$ )  $\times$  Response(CoP- $SD$ ):  $b = -1.36 \times 10^0$ ,  $p = 0.009$ ; Trial  $\times$   
272 Segment(Linear)  $\times$  Impulse(CoP- $H_{fGn}$ )  $\times$  Response(CoP- $SD$ ):  $b = -4.81 \times 10^{-1}$ ,  $p = 0.046$ ; Trial  
273  $\times$  Segment(Quad)  $\times$  Impulse(CoP- $H_{fGn}$ )  $\times$  Response(CoP- $SD$ ):  $b = 1.04 \times 10^0$ ,  $p < 0.0001$ ].  
274 Effects promoting greater CoP- $H_{fGn}$  at first generally vanished with Trial (Trial  $\times$   
275 Segment(Linear)  $\times$  Impulse(CoP- $H_{fGn}$ )  $\times$  Response(CoP- $H_{fGn}$ ):  $b = -5.54 \times 10^{-1}$ ,  $p = 0.021$ ; Trial  
276  $\times$  Segment(Quad)  $\times$  Impulse(CoP- $H_{fGn}$ )  $\times$  Response(CoP- $H_{fGn}$ ):  $b = -1.55 \times 10^0$ ,  $p = 0.003$ ).  
277 Across trials, prior increases in CoP- $SD$  exerted a weaker decrease-and-nonlinear-rebound  
278 form on later CoM- $H_{fGn}$  responses (Trial  $\times$  Segment(Quad)  $\times$  Impulse(CoP- $SD$ ):  $b = -5.50 \times 10^{-1}$ ,  
279  $p = 0.001$ ; and Trial  $\times$  Segment(Cubic)  $\times$  Impulse(CoP- $SD$ ):  $b = 3.02 \times 10^0$ ,  $p = 0.077$ ) but  
280 retained this later effect on CoM- $H_{fGn}$  (Trial  $\times$  Segment(Quad)  $\times$  Impulse(CoP- $SD$ )  $\times$   
281 Response(CoP- CoM- $H_{fGn}$ ):  $b = 5.37 \times 10^{-1}$ ,  $p = 0.023$ ) and on itself (Trial  $\times$  Segment(Quad)  $\times$   
282 Impulse(CoP- $SD$ )  $\times$  Response(CoP- $SD$ ):  $b = 5.48 \times 10^{-1}$ ,  $p = 0.023$ ).

283 Though not pictured here, this latter effect held robustly across all viewing conditions:  
284 prior increases in CoP- $SD$  predicted later increases in CoP- $SD$ , with the size of this later  
285 increase dwindling quadratically at a decreasing rate with Segment (table S2).

### 286 **3.3. Intrapostural interactivity in the 50-cm viewing condition resembled that in the** 287 **eyes-closed condition than that in other viewing conditions (Hypothesis 3)**

288 Visually fixating at 50 cm elicited the least amount of intrapostural interactivity, closely  
289 resembling the eyes-closed condition. This point is evident first in terms of the number of  
290 significant effects. For instance, the regression model yielded 72 coefficients for each  
291 condition (tables S2–S6). Compared to effects for all other eyes-open conditions, the 50-cm  
292 condition showed significant but opposite effects of Segment(Linear), Trial  $\times$  Segment(Linear),  
293 and Trial  $\times$  Segment(Linear)  $\times$  Response(CoP- $SD$ ) from the 135-cm condition (table S3), and  
294 a significant but opposite effect of Trial  $\times$  Segment(Linear)  $\times$  Response(CoP- $H_{fGn}$ ) from all  
295 other eyes-open conditions (table S4). Of the remaining nine significant effects, Impulse(CoP-  
296  $H_{fGn}$ ), Segment(Linear)  $\times$  Impulse(CoP- $SD$ ) and Trial  $\times$  Impulse(CoP- $H_{fGn}$ ) did not show  
297 significance in any other eyes-open condition, and one other followed the same sign but was  
298 little more than half as large as the same significant effect for all other eyes-open conditions  
299 (table S4).

300 In short, these distinctions entailed that, with Trial, the 50-cm condition showed greater  
301 but shorter-term reductions in  $SD$  following increases in CoP- $H_{fGn}$ , for instance, more negative  
302 change in CoP- $SD$  with Trial (Trial  $\times$  Impulse(CoP- $H_{fGn}$ )  $\times$  Response(CoP- $SD$ ):  $b = -4.98 \times 10^{-3}$ ,  
303  $p = 0.023$ ; table S6) and stronger subsequent positive linear growth in CoP- $SD$  (Trial  $\times$   
304 Segment(Linear)  $\times$  Impulse(CoP- $H_{fGn}$ ):  $b = 4.87 \times 10^{-1}$ ,  $p = 0.043$ ; table S4) than in other eyes-  
305 open conditions. The other eyes-open conditions typically showed a decrease in CoP- $SD$   
306 following an increase in CoP- $H_{fGn}$ , but the subsequent rebound of CoP- $H_{fGn}$  to zero change  
307 was slower and more nonlinear with Trial (Trial  $\times$  Segment(Quad)  $\times$  Impulse(CoP- $H_{fGn}$ )  $\times$   
308 Response(CoP- $SD$ ):  $bs = -1.19 \times 10^0$ ,  $-9.22 \times 10^{-1}$ ,  $-1.17 \times 10^0$ , and  $-1.12 \times 10^0$  for the 20-, 135-,  
309 220-, and 305- cm conditions, respectively,  $ps < 0.01$ ; table S4). Critically, the 50-cm condition  
310 was the only condition that did not show this change in the nonlinearity of later responses in  
311 CoP- $SD$ .

### 312 **3.4. CoM- $H_{fGn}$ and CoP- $H_{fGn}$ self-corrected from segment to segment within a trial but** 313 **showed sparse effects on each other (Hypothesis 3)**

314 In the eyes-open conditions, increases in CoM- $H_{fGn}$  and CoP- $H_{fGn}$  (CoM- $H_{fGn}$  and CoP-  
315  $H_{fGn}$ , respectively) predicted later increases and decreases in alternation over subsequent



316 segments (tables S2 and S5; figures 4a and 4d), suggesting that the eyes-open conditions  
317 prompted a sort of self-correcting maintenance of fractality within CoM and CoP. Thus, the act  
318 of visually fixating prompted fractality to fall in and out of zero change or to cycle around zero  
319 change with negative and positive changes following each other. The model did not yield  
320 significant IRF relationships between CoM- $H_{fGn}$  and CoP- $H_{fGn}$  (table S2; figures 4b, c): only the  
321 220-cm viewing condition was accompanied by a CoM- $H_{fGn}$  impulse that predicted later CoP-  
322  $H_{fGn}$  responses (figure 4d).

### 323 **3.5. Increases in CoP- $H_{fGn}$ and CoP-SD predicted subsequent decreases in each other** 324 **with trials (Hypothesis 4)**

325 In the eyes-open conditions, prior impulses in CoP- $H_{fGn}$  and CoP-SD both predicted  
326 later decreases in CoP-SD and CoP- $H_{fGn}$ , respectively (figure 5; table S5). These IRF  
327 relationships remained robust with Trial, more so for the effects of a prior CoP-SD impulse on  
328 later CoP- $H_{fGn}$  responses (figure 5a) than for the effects of a prior CoP- $H_{fGn}$  impulse on later  
329 CoP-SD responses (figure 5b). The 305-cm viewing condition failed to show a significant  
330 relationship between a prior CoP-SD impulse and later CoP- $H_{fGn}$  responses on only one trial.  
331 The 25-, 135-, and 220-cm conditions each exhibited one, one, and two trials, respectively,  
332 that failed to show a relationship between a prior CoP- $H_{fGn}$  impulse and later CoP-SD  
333 responses.

334

## 335 **4. Discussion**

336 We tested four specific hypothesis concerning how visual effort might moderate  
337 intrapostural interactivity. First, we predicted that standing quietly with eyes closed would  
338 exhibit weaker intrapostural interactivity (Hypothesis 1). Second, we predicted that CoM- $H_{fGn}$   
339 and CoP- $H_{fGn}$  would self-correct over time (Hypothesis 2). Third, we predicted an inverse  
340 relationship between SD and fractality over time, that is, that increases in CoM- $H_{fGn}$  and CoP-  
341  $H_{fGn}$  would prompt later decreases in CoP-SD (Hypothesis 3a) and that increases in CoP-SD  
342 would prompt later decreases in CoM- $H_{fGn}$  and CoP- $H_{fGn}$  (Hypothesis 3b). Fourth, we  
343 predicted that these intrapostural interactions in the 50-cm viewing condition would most  
344 closely resemble intrapostural interactions in the eyes-closed condition (Hypothesis 4).  
345 Results supported all four hypotheses with the only exception being the failure of CoM- $H_{fGn}$  to  
346 participate in the relationships predicted in Hypothesis 3.

347 The regression modeling of IRFs revealed that in the eyes-closed condition, most  
348 effects of CoM- $H_{fGn}$ , CoP- $H_{fGn}$ , and CoP-SD on themselves and on each other were brief and  
349 canceled out with Segment and Trial (Hypothesis 1). Figures 4 and 5 show that IRF modeling  
350 did yield some significant later responses, but the non-significant coefficients yielded by the  
351 model reflect the fact that these significant responses were sparse and unstable.

352 CoM- $H_{fGn}$  and CoP- $H_{fGn}$  did indeed self-correct (Hypothesis 2), with zig-zag IRF plots  
353 indicating alternation between temporal correlations (i.e., persistence) and anticorrelations  
354 (i.e., antipersistence) or at least between varying degrees of temporally correlated  
355 persistence. These switches occurred as quickly as from one 10-s segment to the next, but  
356 this lag-1-segment relationship was not uniform across time or conditions (figures 4a and 4c).  
357 This finding resonates with the canonical idea that sway shows short-term persistence  
358 followed by long-term antipersistence [35,36]. The variation from greater or lesser temporal  
359 correlations from segment to segment is fleeting. These zig-zag IRF plots may reflect, first,  
360 greater persistence of sway within the base of support's center and, second, braking or  
361 reversing by the postural control system as it approaches the margins of the base of support

362 [1,2]. However, testing this spatial interpretation would benefit from “rambling-trembling”  
363 frameworks that recognize a slow-moving reference point anchoring CoP within the base of  
364 support [49,50]. These findings thus warrant further investigations into how visual information  
365 moderates the rambling-trembling aspects of posture (e.g., [50,51]).

366 The 50-cm viewing condition yielded intrapostural interactivity that most closely  
367 resembled that in the eyes-closed condition (Hypothesis 3). The effects between CoP- $SD$  and  
368 CoP- $H_{fGn}$  in the 50-cm condition gradually decayed across trials (figure 5). These effects did  
369 not show up in every trial for all other viewing conditions, but the regression coefficient found  
370 significant nonzero effects between fractality and  $SD$  for all other viewing conditions and only  
371 predicted the canceling out of these effects for 50-cm condition. Hence, the viewing distances  
372 known to strain oculomotor convergence [14,15] prompted less of the intrapostural  
373 relationships that supported posture at other viewing distances. Additionally, the predicted  
374 effects of  $SD$  on later fractality were robust for all trials across all condition, and those of  
375 fractality on later  $SD$  were less robust for the 135- and 220-cm conditions. This latter  
376 difference indicates that, to some extent, targets at medium distances beyond the comfortable  
377 viewing distance might also stabilize posture [52].

378 Prior increases in CoP- $SD$  and CoP- $H_{fGn}$  predicted later decreases in CoP- $SD$  and  
379 CoP- $H_{fGn}$ , respectively (Hypothesis 4). As noted in Results for Hypothesis 1, prior increases in  
380 CoP- $SD$  predicted later increases in itself with Segment, thus showing none of the self-  
381 corrective aspects shown by CoP- $H_{fGn}$ . Hence, increase in CoP- $SD$  predicted both later  
382 increases in CoP- $SD$  and later decreases in CoP- $H_{fGn}$ , and increases in CoP- $H_{fGn}$  predicted  
383 later decreases in both CoP- $SD$  and CoP- $H_{fGn}$ .

#### 384 **4.2. Glimpses of a possible control policy for visually guided quiet stance**

385 The present results offer insights into a possible control policy for postural stability that  
386 balances CoP- $H_{fGn}$  with an excess of CoP- $SD$ . If left to  $SD$  alone, posture would lean towards  
387 higher variability without clear bound: any increase in  $SD$  would predict later increases, and  
388 those later increases would predict even later increases, and so on. The predicted later  
389 decreases in fractality would then only serve to promote greater  $SD$ . It is only the corrective  
390 aspect of fractality that might allow posture to rein in the apparently self-promoting and  
391 unbounded  $SD$ . For instance, any decreases in fractality following increases in  $SD$  might  
392 trigger subsequent increases in fractality that would induce a negative check on  $SD$ . This  
393 causal interpretation aims only to offer a possible control policy that these results could  
394 reflect. Such causal interpretation warrants manipulations of  $SD$  and fractality of CoP  
395 fluctuations (if only indirectly) through a balance board or vibrotactile stimulation.

396 The present results from VAR analysis examining relationships between earlier  
397 impulses and later responses raise new questions for future work. For instance, past work  
398 involving explicit feedback to participants completing a motor task found that performance  
399 feedback weakened temporal correlations in movement variability in the task [53–55]. In the  
400 task of counting seconds by tapping a finger [53], the feedback provided with each tap  
401 allowed participants to offset deviations in a way that prevented errors from propagating from  
402 one tap to the next. At first glance, this finding seems at odds with the present finding that  
403 better performance—standing more quietly with less  $SD$ —would follow from and contribute to  
404 stronger and not weaker temporal correlations. However, it is possible that, in postural tasks,  
405 greater sway is endogenous, implicit feedback that signals the postural control system that  
406 corrections are appropriately implemented. In this way, if some proportion of  $SD$  reflects sway  
407 that triggers postural corrections (e.g., [56]), then the present findings would align with past  
408 findings of feedback decorrelating movement variability.

409 This proposed control policy may resolve long-standing questions about how  
410 fluctuations support movement stability—explicitly speaking to the “loss of complexity”  
411 hypothesis that fractal sway might be the signature of stability, suggestive of young, healthy,  
412 and typically developing physiology. This hypothesis has proven provocative but controversial.  
413 Indeed, exploratory clinical research found that temporal correlations might wander within but  
414 also beyond the fractal range. But the clinical implications were mixed, with some results  
415 indicating stronger temporal correlations in sway for younger, healthier and more typically  
416 developing participants [38,57] and other results indicating the opposite [57–59]. Meanwhile,  
417 experimental work applying “white-noise”—that is, temporally uncorrelated—mechanical  
418 vibration to the feet found that this, by definition, non-fractal and so non-complex signal  
419 stabilized sway [60,61]. In finding that greater temporal correlations were associated with later  
420 decreases in *SD* of sway, the present results align well with only half of the exploratory  
421 evidence and poorly with the finding that uncorrelated stimulation reduced sway.

422 Making matters seem even more paradoxical, results have curiously diverged within  
423 the same research paradigms in this vein. A reanalysis of Priplata et al.’s [61] data yielded two  
424 details [62]. Firstly, white-noise stimulation reduced temporal correlations in sway. So, in the  
425 case of unhealthy level of complexity, decorrelating overly correlated fluctuations may be an  
426 effective clinical strategy. However, secondly and less straightforwardly, the reanalysis  
427 showed that white-noise stimulation elicited stronger reduction of sway for participants  
428 exhibiting stronger temporal correlations. In a sense, white-noise stimulation seems to wipe  
429 out its efficacy by counteracting the very conditions of endogenous postural fluctuations that  
430 give it a stabilizing effect. This self-nullifying aspect of the stimulation seemed quite puzzling.

431 The present work solves some of this puzzle. All past work sought to find predictive  
432 effects of fluctuation patterns by associating concurrent variables: temporal correlations and  
433 sway variability for the same postural measurement series. The major contributions of  
434 examining prior effects and later responses are twofold: first, fractal temporal correlations self-  
435 correct, and second, stronger temporal correlations reduce CoP-*SD*. Together, these two  
436 points provide a framework in which the present findings align neatly with research on white-  
437 noise stimulation stabilizing posture [60,61] and to explain how fractal temporal correlations  
438 could be sometimes stabilizing and sometimes destabilizing.

439 Self-correction of fractal temporal correlations has been the key feature missing from  
440 the portrayal of postural stability until now. If fractal temporal correlations did not self-correct,  
441 then *SD* would increase or decrease unchecked, subverting postural stability [3,4]. Lack of  
442 self-correction in temporal correlations would mean that temporal correlations and *SD* might  
443 push each other to opposite extremes. Posture lacking sufficient variability would be unstable  
444 and overly temporally correlated; posture having too much variability would be unstable and  
445 have too little temporal correlations. Understanding self-correction in temporal correlations  
446 might then be one of the key directions for future work. Differences in temporal correlations  
447 are well-known [35,36] and often replicated [37]. The novelty lies in recognizing that weaker  
448 temporal correlations in longer timescales may hold only on average, consisting of shorter-  
449 timescale ebbing and flowing of temporal correlations. Across 10-s segments within a single  
450 trial, the VAR found a sequence of fleeting (e.g., 10-s) bouts of postural sway predicting later  
451 alternations between more or less temporal correlations.

452 The exact basis of this alternation of temporal correlations warrants further  
453 investigation. The question of whether these spatial constraints govern temporal correlations’  
454 self-correction would benefit from rigorous test in the “rambling-trembling” framework. This  
455 framework recognizes that the fixed reference point anchoring CoP within the base of support

456 drifts slowly. Thus, it is important to model the rise and fall of temporal correlations as a  
457 function of the distance between the fixed reference point and the edges of the base of  
458 support. The space that “rambling” leaves open for stable, “trembling” may govern how  
459 quickly temporal correlations alternate. Such modeling could add to the ongoing elaborations  
460 of the rambling-trembling framework to include visual constraints [50,51].

461 We do mean this proposal to only serve as a glimpse of what needs further validation.  
462 Naturally, the correlational analysis results are prone to mischaracterizing the measured  
463 variables as actual causal variables. *SD* and fractal scaling are measurements commonly  
464 thought to be essential state variables in postural control. They may reflect contributions from  
465 a limited subset of actual control parameters. Certainly, *SD* and fractal exponents are not  
466 inherently physiological features but emergent properties of the postural task. However, actual  
467 control parameters may be no less emergent from task constraints—one of the rare  
468 agreements between current cognitivist theorizing about visual attention [63] and long-  
469 standing views in ecological psychology [64]. So, although the emergent control may not have  
470 the same labels for its control parameters, similar observed relationships could explain a host  
471 of previous results, as discussed above.

472 Visually fixating brings a prestressed quiet stance into one with informational coupling  
473 with the visual stimulus. Past work has repeatedly implicated fractal fluctuations in the head  
474 and upper torso for using visual information to organize action [28,29,65–68]. Visual  
475 inspection of IRF plots indicated rare instances of effects from or responses from CoM  
476 fractality on or to *SD* (1 trial in the 50-, 135-, and 305-cm conditions), but the regression  
477 modeling indicated no stable relationship. So, the absence of significant IRF relationships for  
478  $\text{CoM-}H_{\text{Gn}}$  on  $\text{CoP-}SD$  is puzzling. However, past evidence suggests that fluctuations in the  
479 upper body moderate the use of visual information beyond and possibly in collaboration with  
480 the retina’s microsaccades. CoP and movements of the upper extremities exhibit a close  
481 mutual predictive relationship in fractal and multifractal fluctuations even without involving a  
482 significant role of torso fluctuations [30,31]. Indeed, should tensegrity-themed metaphors for  
483 the movement system be apt [18], then we can expect relatively less local relationships, and  
484 CoM may be one of the multiple intermediary links in the anatomical change that need not  
485 always participate in controlling posture. Fuller-body set of measurements may allow clearer  
486 portrayal of causal relationships knitting retinal fluctuations with CoP fluctuations.

487 **Supplementary materials**

488 **Dataset 1.** DFA exponents used for VAR analysis.

489 **Table S1.** *Mean±s.e.m.* values of  $H_{fGn}$  yielded by DFA for the original (unshuffled) and a  
490 shuffled version of each CoM SED and CoP PED time series, and coefficients of paired  
491 samples *t*-tests comparing the two.

492 **Table S2.** Regression coefficients for all effects for the eyes-closed condition.

493 **Table S3.** Regression coefficients by the eyes-open conditions for the effects and interactions  
494 of Segment, Trial, Response(CoP- $H_{fGn}$ ), and Response(CoP-*SD*) without specific pairwise  
495 interactions.

496 **Table S4.** Regression coefficients by the eyes-open conditions for interactions of Segment,  
497 Trial, Impulse(CoP- $H_{fGn}$ ), and Impulse(CoP-*SD*) without specific pairwise interactions.

498 **Table S5.** Regression coefficients by the eyes-open conditions for interactions of Segment  
499 and Trial with specific pairwise self-interactions (i.e., of prior impulses of CoP- $H_{fGn}$  on itself,  
500 and of prior impulses of CoP-*SD* on itself).

501 **Table S6.** Regression coefficients by the eyes-open conditions for interactions of Segment  
502 and Trial with specific pairwise other-interactions (i.e., of prior impulses of CoP- $H_{fGn}$  on later  
503 values of CoP-*SD*, and of prior impulses of CoP-*SD* on later values of CoP- $H_{fGn}$ ).

## 504 **References**

- 505 1. Zatsiorsky VM, Duarte M. 1999 Instant equilibrium point and its migration in standing  
506 tasks: Rambling and trembling components of the stabilogram. *Motor Control* **3**, 28–38.  
507 (doi:10.1123/mcj.3.1.28)
- 508 2. Winter DA. 1995 Human balance and posture control during standing and walking. *Gait*  
509 *Posture* **3**, 193–214. (doi:10.1016/0966-6362(96)82849-9)
- 510 3. Chen L-C, Metcalfe JS, Chang T-Y, Jeka JJ, Clark JE. 2008 The development of infant  
511 upright posture: Sway less or sway differently? *Exp. Brain Res.* **186**, 293–303.  
512 (doi:10.1007/s00221-007-1236-1)
- 513 4. Rajachandrakumar R, Mann J, Schinkel-Ivy A, Mansfield A. 2018 Exploring the  
514 relationship between stability and variability of the centre of mass and centre of  
515 pressure. *Gait Posture* **63**, 254–259. (doi:10.1016/j.gaitpost.2018.05.008)
- 516 5. Shinbrot T, Muzzio FJ. 2001 Noise to order. *Nature* **410**, 251–258.  
517 (doi:10.1038/35065689)
- 518 6. Turing AM. 1990 The chemical basis of morphogenesis. *Bull. Math. Biol.* **52**, 153–197.  
519 (doi:10.1007/BF02459572)
- 520 7. Montesano G, Crabb DP, Jones PR, Fogagnolo P, Digiuni M, Rossetti LM. 2018  
521 Evidence for alterations in fixational eye movements in glaucoma. *BMC Ophthalmol.* **18**,  
522 191. (doi:10.1186/s12886-018-0870-7)
- 523 8. Meyberg S, Sinn P, Engbert R, Sommer W. 2017 Revising the link between  
524 microsaccades and the spatial cueing of voluntary attention. *Vision Res.* **133**, 47–60.  
525 (doi:10.1016/j.visres.2017.01.001)
- 526 9. Martinez-Conde S, Otero-Millan J, Macknik SL. 2013 The impact of microsaccades on  
527 vision: Towards a unified theory of saccadic function. *Nat. Rev. Neurosci.* **14**, 83–96.  
528 (doi:10.1038/nrn3405)
- 529 10. Murnaghan CD, Carpenter MG, Chua R, Inglis JT. 2016 Keeping still doesn't "make  
530 sense": Examining a role for movement variability by stabilizing the arm during a  
531 postural control task. *J. Neurophysiol.* **117**, 846–852. (doi:10.1152/jn.01150.2015)
- 532 11. Stoffregen TA, Pagulayan RJ, Bardy BG, Hettinger LJ. 2000 Modulating postural control  
533 to facilitate visual performance. *Hum. Mov. Sci.* **19**, 203–220. (doi:10.1016/S0167-  
534 9457(00)00009-9)
- 535 12. Stoffregen TA. 2010 Affordances as properties of the animal-environment system. *Ecol.*  
536 *Psychol.* **15**, 115–134. (doi:10.1207/S15326969ECO1502\_2)

- 537 13. Stoffregen TA, Smart LJ, Bardy BG, Pagulayan RJ. 1999 Postural stabilization of  
538 looking. *J. Exp. Psychol. Hum. Percept. Perform.* **25**, 1641–1658. (doi:10.1037/0096-  
539 1523.25.6.1641)
- 540 14. Jaschinski W. 2002 The proximity-fixation-disparity curve and the preferred viewing  
541 distance at a visual display as an indicator of near vision fatigue. *Optom. Vis. Sci.* **79**,  
542 158–168.
- 543 15. Jaschinski-Kruza W. 1991 Eyestrain in VDU users: Viewing distance and the resting  
544 position of ocular muscles. *Hum. Factors* **33**, 69–83.  
545 (doi:10.1177/001872089103300106)
- 546 16. Párraga CA, Troscianko T, Tolhurst DJ. 2002 Spatiochromatic properties of natural  
547 images and human vision. *Curr. Biol.* **12**, 483–487. (doi:10.1016/S0960-9822(02)00718-  
548 2)
- 549 17. Schleip R, Mechsner F, Zorn A, Klingler W. 2014 The bodywide fascial network as a  
550 sensory organ for haptic perception. *J. Mot. Behav.* **46**, 191–193.  
551 (doi:10.1080/00222895.2014.880306)
- 552 18. Turvey MT, Fonseca ST. 2014 The medium of haptic perception: A tensegrity  
553 hypothesis. *J. Mot. Behav.* **46**, 143–187. (doi:10.1080/00222895.2013.798252)
- 554 19. Cabe PA. 2018 All perception engages the tensegrity-based haptic medium. *Ecol.*  
555 *Psychol.* **31**, 1–13. (doi:10.1080/10407413.2018.1526037)
- 556 20. Ingber DE. 2006 Cellular mechanotransduction: Putting all the pieces together again.  
557 *FASEB J.* **20**, 811–827. (doi:10.1096/fj.05-5424rev)
- 558 21. Nelson CM, Jean RP, Tan JL, Liu WF, Sniadecki NJ, Spector AA, Chen CS. 2005  
559 Emergent patterns of growth controlled by multicellular form and mechanics. *Proc. Natl.*  
560 *Acad. Sci. U. S. A.* **102**, 11594–11599. (doi:10.1073/pnas.0502575102)
- 561 22. Ingber DE. 2010 From cellular mechanotransduction to biologically inspired  
562 engineering. *Ann. Biomed. Eng.* **38**, 1148–1161. (doi:10.1007/s10439-010-9946-0)
- 563 23. Ingber DE. 2008 Tensegrity-based mechanosensing from macro to micro. *Prog.*  
564 *Biophys. Mol. Biol.* **97**, 163–179. (doi:10.1016/j.pbiomolbio.2008.02.005)
- 565 24. Hajnal A, Clark JD, Doyon JK, Kelty-Stephen DG. 2018 Fractality of body movements  
566 predicts perception of affordances: Evidence from stand-on-ability judgments about  
567 slopes. *J. Exp. Psychol. Hum. Percept. Perform.* **44**, 836–841.  
568 (doi:10.1037/xhp0000510)
- 569 25. Doyon JK, Hajnal A, Surber T, Clark JD, Kelty-Stephen DG. 2019 Multifractality of  
570 posture modulates multisensory perception of stand-on-ability. *PLoS One* **14**,  
571 e0212220. (doi:10.1371/journal.pone.0212220)

- 572 26. Palatinus Z, Dixon JA, Kelty-Stephen DG. 2013 Fractal fluctuations in quiet standing  
573 predict the use of mechanical information for haptic perception. *Ann. Biomed. Eng.* **41**,  
574 1625–1634. (doi:10.1007/s10439-012-0706-1)
- 575 27. Palatinus Z, Kelty-Stephen DG, Kinsella-Shaw J, Carello C, Turvey MT. 2014 Haptic  
576 perceptual intent in quiet standing affects multifractal scaling of postural fluctuations. *J.*  
577 *Exp. Psychol. Hum. Percept. Perform.* **40**, 1808–1818. (doi:10.1037/a0037247)
- 578 28. Mangalam M, Chen R, McHugh TR, Singh T, Kelty-Stephen DG. 2020 Bodywide  
579 fluctuations support manual exploration: Fractal fluctuations in posture predict  
580 perception of heaviness and length via effortful touch by the hand. *Hum. Mov. Sci.* **69**,  
581 102543. (doi:10.1016/j.humov.2019.102543)
- 582 29. Mangalam M, Kelty-Stephen DG. 2020 Multiplicative-cascade dynamics supports  
583 whole-body coordination for perception via effortful touch. *Hum. Mov. Sci.* **70**, 102595.  
584 (doi:10.1016/j.humov.2020.102595)
- 585 30. Mangalam M, Carver NS, Kelty-Stephen DG. 2020 Global broadcasting of local fractal  
586 fluctuations in a bodywide distributed system supports perception via effortful touch.  
587 *Chaos, Solitons & Fractals* **135**, 109740. (doi:10.1016/j.chaos.2020.109740)
- 588 31. Mangalam M, Carver NS, Kelty-Stephen DG. 2020 Multifractal signatures of perceptual  
589 processing on anatomical sleeves of the human body. *bioRxiv* , 091702.  
590 (doi:10.1101/2020.05.12.091702)
- 591 32. Lee I-C, Pacheco MM, Newell KM. 2019 The precision demands of viewing distance  
592 modulate postural coordination and control. *Hum. Mov. Sci.* **66**, 425–439.  
593 (doi:https://doi.org/10.1016/j.humov.2019.05.019)
- 594 33. Fiorelli CM, Polastri PF, Rodrigues ST, Baptista AM, Penedo T, Pereira VAI, Simieli L,  
595 Barbieri FA. 2017 Gaze position interferes in body sway in young adults. *Neurosci. Lett.*  
596 **660**, 130–134. (doi:10.1016/j.neulet.2017.09.008)
- 597 34. Lê T-T, Kapoula Z. 2008 Role of ocular convergence in the Romberg quotient. *Gait*  
598 *Posture* **27**, 493–500. (doi:10.1016/j.gaitpost.2007.06.003)
- 599 35. Collins JJ, De Luca CJ. 1993 Open-loop and closed-loop control of posture: A random-  
600 walk analysis of center-of-pressure trajectories. *Exp. Brain Res.* **95**, 308–318.  
601 (doi:10.1007/BF00229788)
- 602 36. Collins JJ, De Luca CJ. 1995 Upright, correlated random walks: A statistical-  
603 biomechanics approach to the human postural control system. *Chaos An Interdiscip. J.*  
604 *Nonlinear Sci.* **5**, 57–63. (doi:10.1063/1.166086)
- 605 37. Gilfriche P, Deschodt-Arsac V, Blons E, Arsac LM. 2018 Frequency-specific fractal  
606 analysis of postural control accounts for control strategies. *Front. Physiol.* **9**, 293.  
607 (doi:10.3389/fphys.2018.00293)



- 608 38. Duarte M, Sternad D. 2008 Complexity of human postural control in young and older  
609 adults during prolonged standing. *Exp. Brain Res.* **191**, 265–276. (doi:10.1007/s00221-  
610 008-1521-7)
- 611 39. Duarte M, Zatsiorsky VM. 2001 Long-range correlations in human standing. *Phys. Lett.*  
612 *A* **283**, 124–128. (doi:10.1016/S0375-9601(01)00188-8)
- 613 40. Zatsiorsky V, Seluyanov V. 1985 Estimation of the mass and inertia characteristics of  
614 the human body by means of the best predictive regression equations. *Biomechanics*  
615 **IX-B**, 233–239.
- 616 41. Peng C-K, Buldyrev S V, Havlin S, Simons M, Stanley HE, Goldberger AL. 1994 Mosaic  
617 organization of DNA nucleotides. *Phys. Rev. E* **49**, 1685–1689.  
618 (doi:10.1103/PhysRevE.49.1685)
- 619 42. Peng C-K, Havlin S, Stanley HE, Goldberger AL. 1995 Quantification of scaling  
620 exponents and crossover phenomena in nonstationary heartbeat time series. *Chaos An*  
621 *Interdiscip. J. Nonlinear Sci.* **5**, 82–87. (doi:10.1063/1.166141)
- 622 43. Sims CA. 1980 Macroeconomics and reality. *Econometrica* **48**, 1–48.  
623 (doi:10.2307/1912017)
- 624 44. Lutkepohl H. 2007 *New Introduction to Multiple Time Series Analysis*. New York, NY:  
625 Springer.
- 626 45. Hatemi-J A. 2004 Multivariate tests for autocorrelation in the stable and unstable VAR  
627 models. *Econ. Model.* **21**, 661–683. (doi:10.1016/j.econmod.2003.09.005)
- 628 46. Pfaff B, Stigler M, Pfaff MB. 2018 Package ‘vars’. *R Packag. version 1.5-3*
- 629 47. Singer JD, Willett JB. 2003 *Applied Longitudinal Analysis: Modeling Change and Event*  
630 *Occurrence*. New York, NY: Oxford University Press.
- 631 48. Pinheiro J, Bates D, DebRoy S, Sarkar D, Team RC. 2018 nlme: Linear and nonlinear  
632 mixed effects models. *R Packag. version 3.1-137*
- 633 49. Zatsiorsky VM, Duarte M. 2000 Rambling and trembling in quiet standing. *Motor*  
634 *Control* **4**, 185–200. (doi:10.1123/mcj.4.2.185)
- 635 50. Ferronato PAM, Barela JA. 2011 Age-related changes in postural control: Rambling and  
636 trembling trajectories. *Motor Control* **15**, 481–493. (doi:10.1123/mcj.15.4.481)
- 637 51. Yamagata M, Popow M, Latash ML. 2019 Beyond rambling and trembling: Effects of  
638 visual feedback on slow postural drift. *Exp. Brain Res.* **237**, 865–871.  
639 (doi:10.1007/s00221-019-05470-w)
- 640 52. Kapoula Z, Lê T-T. 2006 Effects of distance and gaze position on postural stability in  
641 young and old subjects. *Exp. Brain Res.* **173**, 438–445. (doi:10.1007/s00221-006-0382-  
642 1)

- 643 53. Kuznetsov N, Wallot S. 2011 Effects of accuracy feedback on fractal characteristics of  
644 time estimation. *Front. Integr. Neurosci.* **5**, 62. (doi:10.3389/fnint.2011.00062)
- 645 54. Kelty-Stephen DG, Dixon JA. 2014 Interwoven fluctuations during intermodal  
646 perception: Fractality in head sway supports the use of visual feedback in haptic  
647 perceptual judgments by manual wielding. *J. Exp. Psychol. Hum. Percept. Perform.* **40**,  
648 2289–2309. (doi:10.1037/a0038159)
- 649 55. Stephen DG, Hajnal A. 2011 Transfer of calibration between hand and foot: Functional  
650 equivalence and fractal fluctuations. *Attention, Perception, Psychophys.* **73**, 1302–  
651 1328. (doi:10.3758/s13414-011-0142-6)
- 652 56. Hagio K, Obata H, Nakazawa K. 2018 Effects of breathing movement on the reduction  
653 of postural sway during postural-cognitive dual tasking. *PLoS One* **13**, e0197385.  
654 (doi:10.1371/journal.pone.0197385)
- 655 57. Thurner S, Mittermaier C, Ehrenberger K. 2002 Change of complexity patterns in  
656 human posture during aging. *Audiol. Neurotol.* **7**, 240–248. (doi:10.1159/000063740)
- 657 58. Lipsitz LA. 2002 Dynamics of stability: The physiologic basis of functional health and  
658 frailty. *Journals Gerontol. Ser. A* **57**, B115–B125. (doi:10.1093/gerona/57.3.B115)
- 659 59. Ko J-H, Newell KM. 2016 Aging and the complexity of center of pressure in static and  
660 dynamic postural tasks. *Neurosci. Lett.* **610**, 104–109.  
661 (doi:10.1016/j.neulet.2015.10.069)
- 662 60. Priplata A, Niemi J, Salen M, Harry J, Lipsitz LA, Collins JJ. 2002 Noise-enhanced  
663 human balance control. *Phys. Rev. Lett.* **89**, 238101.  
664 (doi:10.1103/PhysRevLett.89.238101)
- 665 61. Priplata AA, Niemi JB, Harry JD, Lipsitz LA, Collins JJ. 2003 Vibrating insoles and  
666 balance control in elderly people. *Lancet* **362**, 1123–1124. (doi:10.1016/S0140-  
667 6736(03)14470-4)
- 668 62. Kelty-Stephen DG, Dixon JA. 2013 Temporal correlations in postural sway moderate  
669 effects of stochastic resonance on postural stability. *Hum. Mov. Sci.* **32**, 91–105.  
670 (doi:10.1016/j.humov.2012.08.006)
- 671 63. Vecera SP, Cosman JD, Vatterott DB, Roper ZJJ. 2014 The control of visual attention:  
672 Toward a unified account. In *The Psychology of Learning and Motivation* (ed BH Ross),  
673 pp. 303–347. Burlington, MA: Academic Press.
- 674 64. Bardy BG, Marin L, Stoffregen TA, Bootsma RJ. 1999 Postural coordination modes  
675 considered as emergent phenomena. *J. Exp. Psychol. Hum. Percept. Perform.* **25**,  
676 1284–1301. (doi:10.1037/0096-1523.25.5.1284)

- 677 65. Teng DW, Eddy CL, Kelty-Stephen DG. 2016 Non-visually-guided distance perception  
678 depends on matching torso fluctuations between training and test. *Attention,*  
679 *Perception, Psychophys.* **78**, 2320–2328. (doi:10.3758/s13414-016-1213-5)
- 680 66. Eddy CL, Kelty-Stephen DG. 2015 Nesting of focal within peripheral vision promotes  
681 interactions across nested time scales in head sway: Multifractal evidence from  
682 accelerometry during manual and walking-based fitts tasks. *Ecol. Psychol.* **27**, 43–67.  
683 (doi:10.1080/10407413.2015.991663)
- 684 67. Bell C, Carver N, Zbaracki J, Kelty-Stephen D. 2019 Nonlinear amplification of  
685 variability through interaction across scales supports greater accuracy in manual  
686 aiming: Evidence from a multifractal analysis with comparisons to linear surrogates in  
687 the Fitts task. *Front. Physiol.* **10**, 998. (doi:10.3389/fphys.2019.00998)
- 688 68. Carver NS, Bojovic D, Kelty-Stephen DG. 2017 Multifractal foundations of visually-  
689 guided aiming and adaptation to prismatic perturbation. *Hum. Mov. Sci.* **55**, 61–72.  
690 (doi:10.1016/j.humov.2017.07.005)

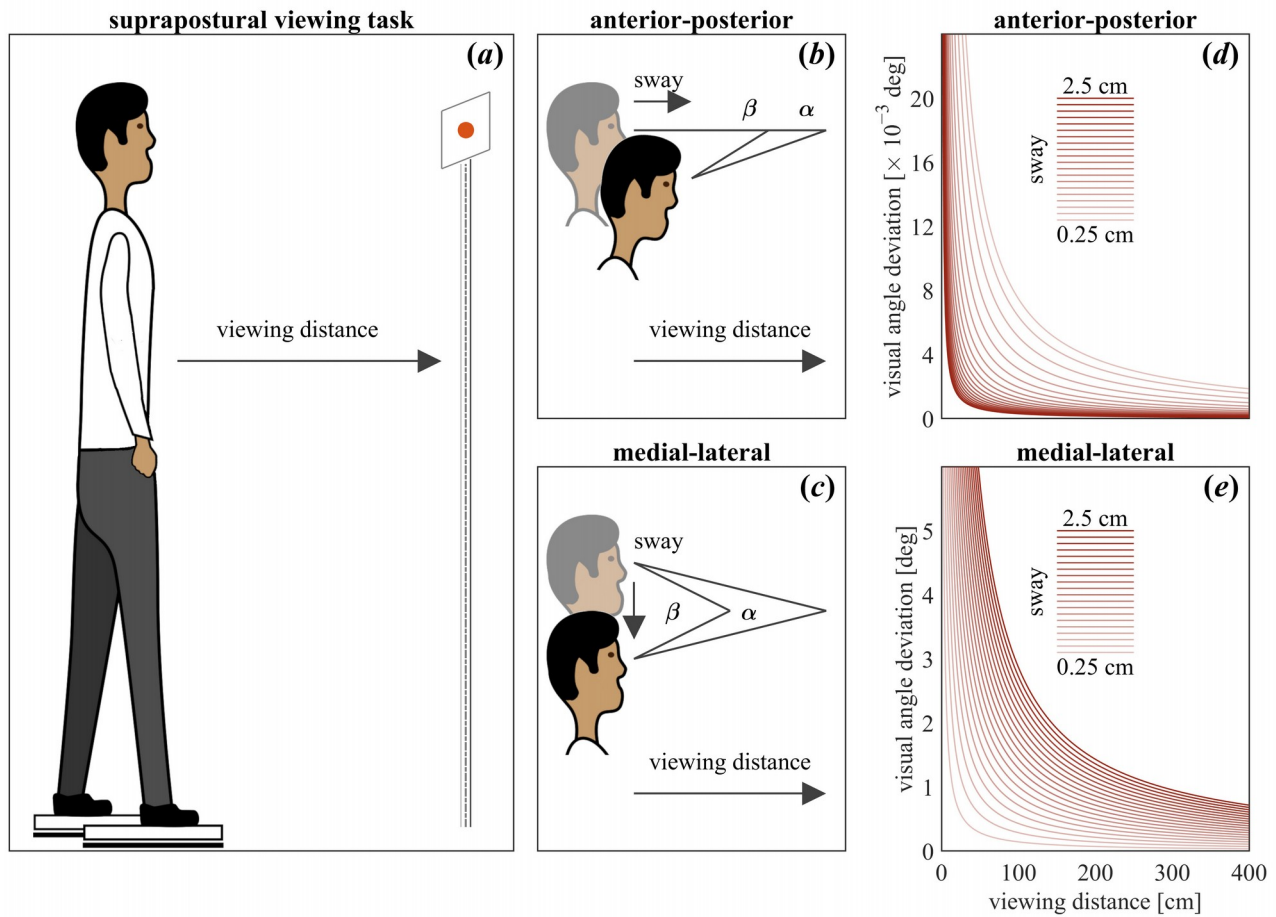

691 **Figure 1.** Schematic of the task and effects of eye-to-target distance on postural sway. (a)  
692 The suprapostural viewing task of standing quietly with the eyes fixated at a distant visual  
693 element. (b, c) Visual angle gain for short vs. long eye-to-target distances along the anterior-  
694 posterior (AP) and medial-lateral (ML) axes. (d, e) Visual angle gain as a function of eye-to-  
695 target distance for different sway magnitudes. Closer targets increase AP sway, whereas  
696 farther targets increase ML sway.

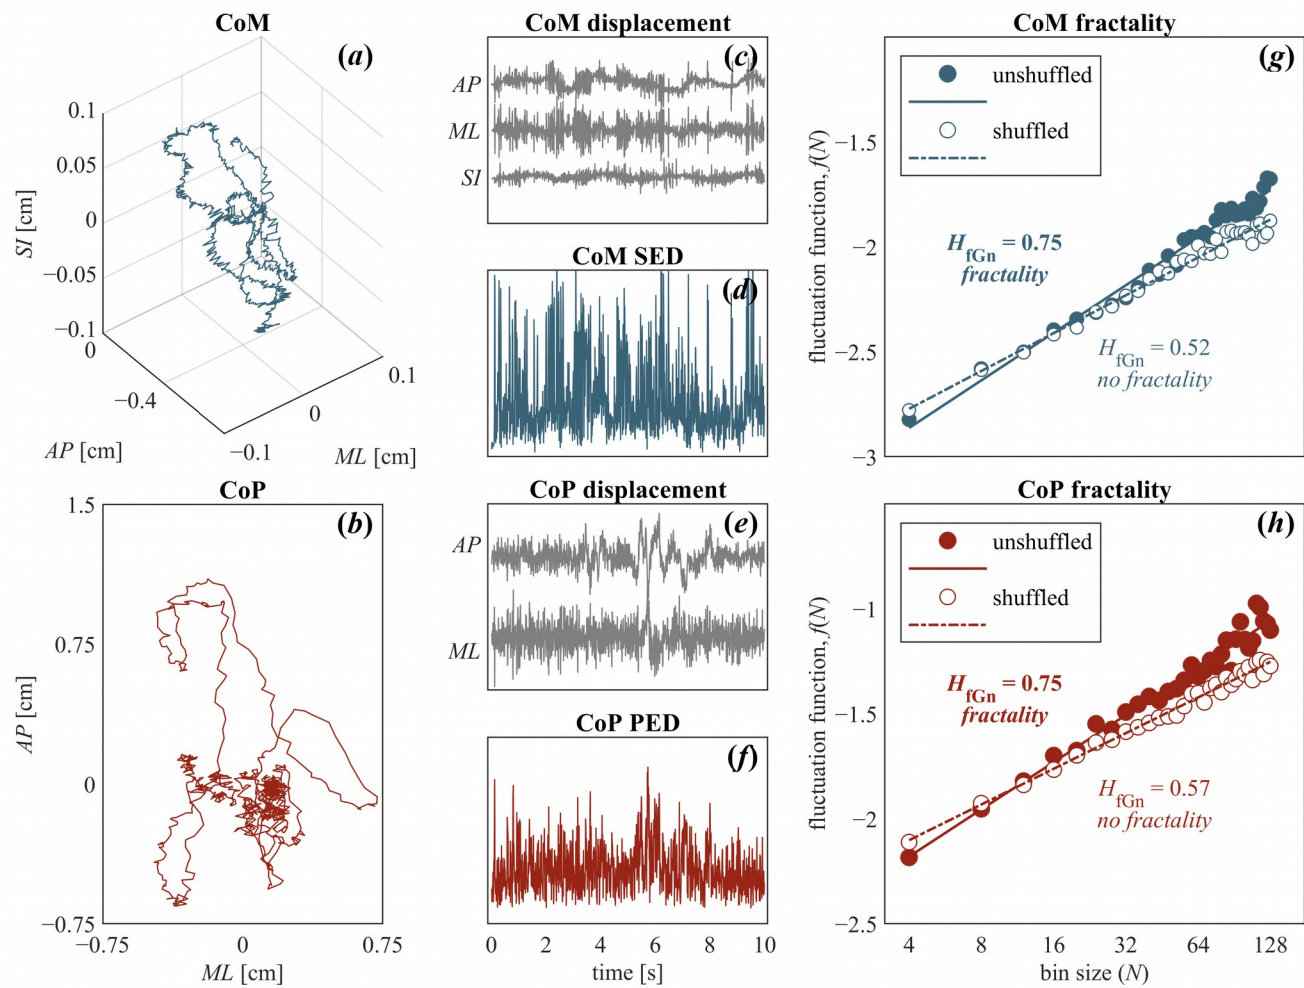

697 **Figure 2.** An overview of the detrended fluctuation analysis (DFA). (a, b) CoM and CoP in a  
 698 representative 10 s segment. (c to f) CoM displacement along the medial-lateral (ML),  
 699 anterior-posterior (AP), and superior-inferior (SI) axes; CoM SED series; CoP displacement  
 700 along the ML, AP, and SI axes; CoP PED series. (g, h) Log-log plots of fluctuation function,  
 701  $f(N)$ , vs. bin size ( $N$ ), reflecting the fractal scaling exponent,  $H_{fGn}$ , yielded by DFA. Solid circles  
 702 and solid trend lines represent  $f(N)$  for the original (unshuffled) series; open circles and  
 703 dashed trend lines represent  $f(N)$  for a shuffled version of the original series.

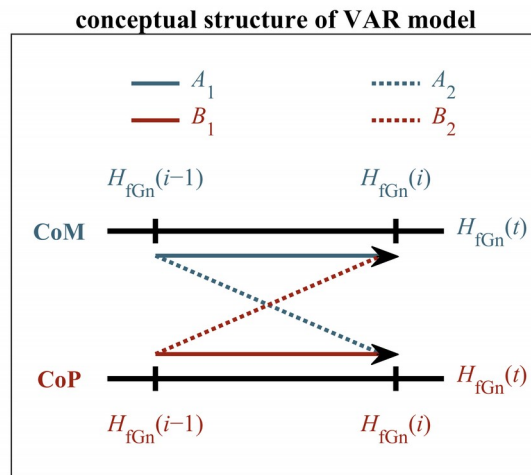

704 **Figure 3.** An overview of the vector autoregressive (VAR) analysis. VAR analysis was used to  
705 model the diffusion of fractal fluctuations across the body, as a time series of segment-by-  
706 segment values of CoM- $H_{fGn}$ , CoP- $H_{fGn}$ , and CoP-SD. Black arrows indicate the effects of  $H_{fGn}$   
707 in the previous segment on  $H_{fGn}$  in the current segment.

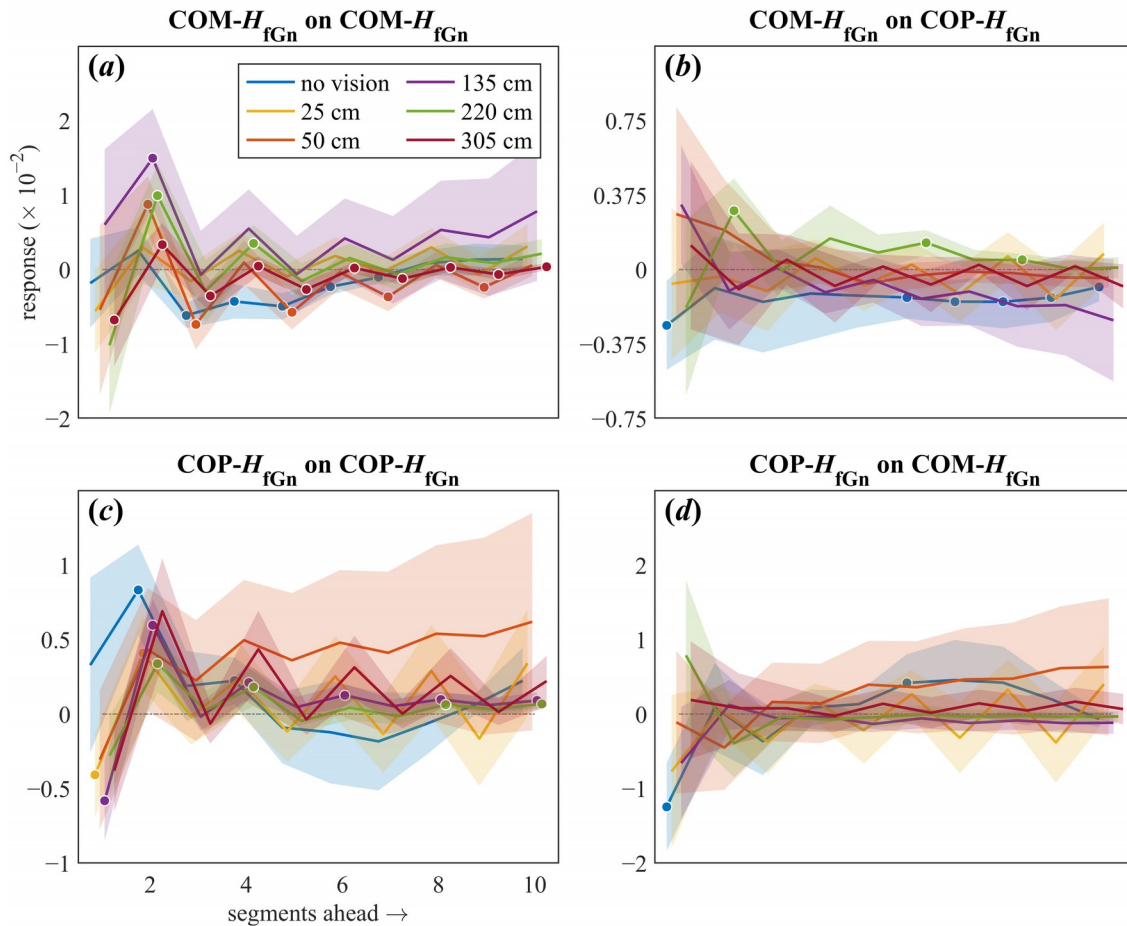

708 **Figure 4.** IRFs predicting the responses over ten segments ahead to an impulse in the  
709 current segment for each viewing condition. (a)  $\text{CoM-}H_{f\text{Gn}}$  on  $\text{CoM-}H_{f\text{Gn}}$ . (b)  $\text{CoM-}H_{f\text{Gn}}$  on  $\text{CoP-}$   
710  $H_{f\text{Gn}}$ . (c)  $\text{CoP-}H_{f\text{Gn}}$  on  $\text{CoP-}H_{f\text{Gn}}$ . (d)  $\text{CoP-}H_{f\text{Gn}}$  on  $\text{CoM-}H_{f\text{Gn}}$ . Shaded areas indicate  
711  $\text{mean} \pm 1 \text{s.e.m.}$  of trial averages across all participants ( $n = 15$ ). Solid circles indicate  
712 statistically significant ( $p < 0.01$ ) responses to an impulse in the  $i^{\text{th}}$  segment. The curves  
713 eventually approach zero, indicating that impulse-responses weakened over subsequent  
714 segments and eventually diminished completely.

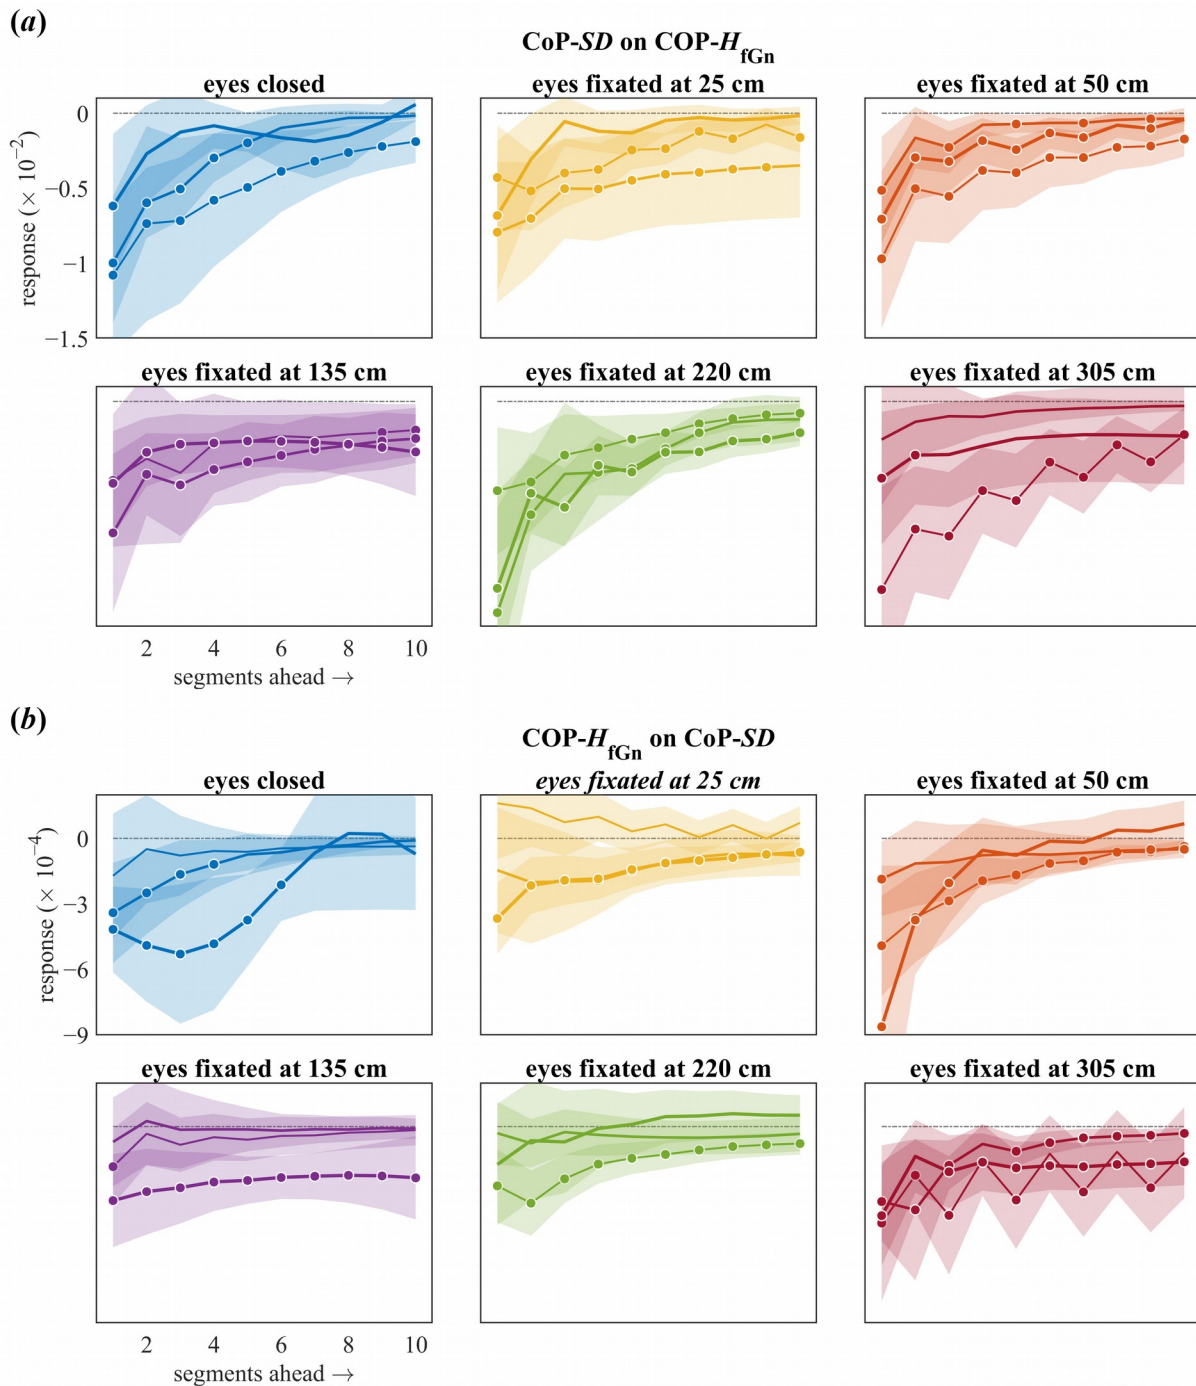

715 **Figure 5.** IRFs predicting the responses over ten segments ahead to an impulse in the  
 716 current segment for each trial for each viewing condition. (a) CoP-SD on CoP- $H_{fGn}$ . (b) CoP-  
 717  $H_{fGn}$  on CoP-SD. Line widths encode trial order (thin: trial-1; medium: trial-2; thick: trial-3).  
 718 Shaded areas indicate  $mean \pm 1s.e.m.$  of trial averages across all participants ( $n = 15$ ). Solid  
 719 circles indicate statistically significant ( $p < 0.01$ ) responses to an impulse in the  $i^{th}$  segment.  
 720 The curves eventually approach zero, indicating that impulse-responses weakened over  
 721 subsequent segments and eventually diminished completely.
